# Supplementary material
Source: publisher figshare collection journal article supplement (https://acs.figshare.com/ndownloader/files/10223703)
Supplement: Supplementary file 1 [file 10223703]

 
data_OCF-99
 
_audit_creation_method            'SHELXL-2014/7'
_shelx_SHELXL_version_number      '2014/7'
_chemical_name_systematic         ?
_chemical_name_common             ?
_chemical_melting_point           ?
_chemical_formula_moiety          'In16 S33 Zn4'
_chemical_formula_sum             'In16 S33 Zn4' 
_chemical_formula_weight          3156.66

loop_
 _atom_type_symbol
 _atom_type_description
 _atom_type_scat_dispersion_real
 _atom_type_scat_dispersion_imag
 _atom_type_scat_source
 'C'  'C'   0.0033   0.0016
 'International Tables Vol C Tables 4.2.6.8 and 6.1.1.4'
 'In'  'In'  -0.7276   1.3100
 'International Tables Vol C Tables 4.2.6.8 and 6.1.1.4'
 'N'  'N'   0.0061   0.0033
 'International Tables Vol C Tables 4.2.6.8 and 6.1.1.4'
 'S'  'S'   0.1246   0.1234
 'International Tables Vol C Tables 4.2.6.8 and 6.1.1.4'
 'Zn'  'Zn'   0.2839   1.4301
 'International Tables Vol C Tables 4.2.6.8 and 6.1.1.4'
 
_space_group_crystal_system       monoclinic
_space_group_IT_number            14
_space_group_name_H-M_alt         'P 21/n'
_space_group_name_Hall            '-P 2yn'
 
_shelx_space_group_comment
;
The symmetry employed for this shelxl refinement is uniquely defined
by the following loop, which should always be used as a source of
symmetry information in preference to the above space-group names.
They are only intended as comments.
;
 
loop_
 _space_group_symop_operation_xyz
 'x, y, z'
 '-x+1/2, y+1/2, -z+1/2'
 '-x, -y, -z'
 'x-1/2, -y-1/2, z-1/2'
 
_cell_length_a                    24.736(4)
_cell_length_b                    26.149(4)
_cell_length_c                    26.677(4)
_cell_angle_alpha                 90
_cell_angle_beta                  107.650(5)
_cell_angle_gamma                 90
_cell_volume                      16442(5)
_cell_formula_units_Z             4
_cell_measurement_temperature     296(2)
_cell_measurement_reflns_used     34215
_cell_measurement_theta_min       4.646
_cell_measurement_theta_max       41.538
 
_exptl_crystal_description        'PLATE'
_exptl_crystal_colour             'COLORLESS'
_exptl_crystal_density_meas       ?
_exptl_crystal_density_method     ?
_exptl_crystal_density_diffrn     1.275          
_exptl_crystal_F_000              5728.0
_exptl_transmission_factor_min    ?
_exptl_transmission_factor_max    ?
_exptl_crystal_size_max           ?
_exptl_crystal_size_mid           ?
_exptl_crystal_size_min           ?
_exptl_absorpt_coefficient_mu     3.189
_shelx_estimated_absorpt_T_min    ?
_shelx_estimated_absorpt_T_max    ?
_exptl_absorpt_correction_type    'MULTI-SCAN'
_exptl_absorpt_correction_T_min   0.5311
_exptl_absorpt_correction_T_max   0.7446
_exptl_absorpt_process_details    ?
_exptl_absorpt_special_details    ?
_diffrn_ambient_temperature       296(2)
_diffrn_radiation_wavelength      0.71073
_diffrn_radiation_type            MoK\a
_diffrn_source                    'fine-focus sealed tube'
_diffrn_measurement_device_type   'Bruker Photon II CPAD diffractometer'
_diffrn_measurement_method        'OMEGA-PHI SCAN'
_diffrn_detector_area_resol_mean  ?
_diffrn_reflns_number             17268
_diffrn_reflns_av_unetI/netI      0.0508
_diffrn_reflns_av_R_equivalents   0.1069
_diffrn_reflns_limit_h_min        ?
_diffrn_reflns_limit_h_max        ?
_diffrn_reflns_limit_k_min        ?
_diffrn_reflns_limit_k_max        ?
_diffrn_reflns_limit_l_min        ?
_diffrn_reflns_limit_l_max        ?
_diffrn_reflns_theta_min          2.235
_diffrn_reflns_theta_max          20.896
_diffrn_reflns_theta_full         20.896
_diffrn_measured_fraction_theta_max   0.991
_diffrn_measured_fraction_theta_full  0.991
_diffrn_reflns_Laue_measured_fraction_max    0.991
_diffrn_reflns_Laue_measured_fraction_full   0.991
_diffrn_reflns_point_group_measured_fraction_max   0.991
_diffrn_reflns_point_group_measured_fraction_full  0.991
_reflns_number_total              17268
_reflns_number_gt                 11123
_reflns_threshold_expression      'I > 2\s(I)'
_reflns_Friedel_coverage          0.000
_reflns_Friedel_fraction_max      .
_reflns_Friedel_fraction_full     .
 
_reflns_special_details
;
 Reflections were merged by SHELXL according to the crystal
 class for the calculation of statistics and refinement.
 
 _reflns_Friedel_fraction is defined as the number of unique
 Friedel pairs measured divided by the number that would be
 possible theoretically, ignoring centric projections and
 systematic absences.
;
 
_computing_data_collection        ?
_computing_cell_refinement        ?
_computing_data_reduction         ?
_computing_structure_solution     ?
_computing_structure_refinement 'SHELXL-2014/7 (Sheldrick, 2014)'
_computing_molecular_graphics     ?
_computing_publication_material   ?
_refine_special_details           ?
_refine_ls_structure_factor_coef  Fsqd
_refine_ls_matrix_type            full
_refine_ls_weighting_scheme       calc
_refine_ls_weighting_details
'w=1/[\s^2^(Fo^2^)+(0.1019P)^2^+21.8297P] where P=(Fo^2^+2Fc^2^)/3'
_atom_sites_solution_primary      ?
_atom_sites_solution_secondary    ?
_atom_sites_solution_hydrogens    .
_refine_ls_hydrogen_treatment     undef
_refine_ls_extinction_method      none
_refine_ls_extinction_coef        .
_refine_ls_number_reflns          17268
_refine_ls_number_parameters      478
_refine_ls_number_restraints      0
_refine_ls_R_factor_all           0.0866
_refine_ls_R_factor_gt            0.0579
_refine_ls_wR_factor_ref          0.1814
_refine_ls_wR_factor_gt           0.1639
_refine_ls_goodness_of_fit_ref    1.078
_refine_ls_restrained_S_all       1.078
_refine_ls_shift/su_max           0.001
_refine_ls_shift/su_mean          0.000
 
loop_
 _atom_site_label
 _atom_site_type_symbol
 _atom_site_fract_x
 _atom_site_fract_y
 _atom_site_fract_z
 _atom_site_U_iso_or_equiv
 _atom_site_adp_type
 _atom_site_occupancy
 _atom_site_site_symmetry_order  
 _atom_site_calc_flag
 _atom_site_refinement_flags_posn
 _atom_site_refinement_flags_adp
 _atom_site_refinement_flags_occupancy
 _atom_site_disorder_assembly
 _atom_site_disorder_group
In01 In 0.59041(4) 0.71940(3) 0.49514(4) 0.0342(3) Uani 1 1 d . . . . .
In1 In 0.64367(4) 0.74734(3) 0.22046(4) 0.0397(3) Uani 1 1 d . . . . .
S1 S 0.24238(15) 0.75883(16) 0.21328(15) 0.0572(11) Uani 1 1 d . . . . .
In02 In 0.66423(4) 0.48733(3) 0.43077(4) 0.0367(3) Uani 1 1 d . . . . .
In2 In 0.71919(4) 0.71357(4) 0.62259(4) 0.0475(3) Uani 1 1 d . . . . .
S2 S 0.34030(15) 0.63683(15) 0.22458(16) 0.0588(11) Uani 1 1 d . . . . .
In03 In 0.46566(4) 0.72375(3) 0.36959(4) 0.0366(3) Uani 1 1 d . . . . .
S3 S 0.36734(14) 0.74961(15) 0.33420(14) 0.0504(10) Uani 1 1 d . . . . .
In04 In 0.77698(4) 0.74376(3) 0.35585(4) 0.0390(3) Uani 1 1 d . . . . .
S4 S 0.39873(15) 0.77456(14) 0.19588(15) 0.0514(10) Uani 1 1 d . . . . .
In05 In 0.74624(4) 0.73451(4) 0.48653(4) 0.0386(3) Uani 1 1 d . . . . .
S5 S 0.43581(14) 0.51729(12) 0.25685(15) 0.0439(9) Uani 1 1 d . . . . .
In06 In 0.53344(4) 0.49202(3) 0.29787(4) 0.0379(3) Uani 1 1 d . . . . .
S6 S 0.47018(12) 0.63000(11) 0.36273(12) 0.0260(7) Uani 1 1 d . . . . .
In07 In 0.69245(4) 0.59913(3) 0.52646(4) 0.0373(3) Uani 1 1 d . . . . .
S7 S 0.49311(14) 0.74854(13) 0.46128(13) 0.0423(9) Uani 1 1 d . . . . .
In08 In 0.43627(4) 0.60886(4) 0.26793(4) 0.0410(3) Uani 1 1 d . . . . .
S8 S 0.49908(12) 0.65011(11) 0.22259(12) 0.0304(8) Uani 1 1 d . . . . .
In09 In 0.69127(4) 0.50244(3) 0.29181(4) 0.0396(3) Uani 1 1 d . . . . .
S9 S 0.52834(13) 0.76846(11) 0.32655(12) 0.0302(8) Uani 1 1 d . . . . .
In0A In 0.74605(4) 0.62700(3) 0.25497(4) 0.0400(3) Uani 1 1 d . . . . .
In0C In 0.49540(4) 0.74469(4) 0.23372(4) 0.0417(3) Uani 1 1 d . . . . .
In0D In 0.63319(4) 0.37434(3) 0.33224(4) 0.0467(3) Uani 1 1 d . . . . .
In0F In 0.80056(5) 0.75854(4) 0.21916(4) 0.0515(3) Uani 1 1 d . . . . .
In0G In 0.33958(4) 0.72840(4) 0.24019(4) 0.0526(3) Uani 1 1 d . . . . .
S10 S 0.55033(15) 0.78361(13) 0.18296(14) 0.0449(9) Uani 1 1 d . . . . .
S12 S 0.56517(13) 0.51494(10) 0.39188(12) 0.0278(8) Uani 1 1 d . . . . .
S11 S 0.53608(15) 0.39979(12) 0.28738(16) 0.0484(10) Uani 1 1 d . . . . .
S13 S 0.59318(12) 0.62539(11) 0.48643(12) 0.0264(7) Uani 1 1 d . . . . .
S19 S 0.67043(17) 0.39487(12) 0.42548(15) 0.0504(10) Uani 1 1 d . . . . .
S18 S 0.67726(13) 0.77156(11) 0.31533(12) 0.0308(8) Uani 1 1 d . . . . .
S17 S 0.64675(13) 0.65418(11) 0.21192(12) 0.0308(8) Uani 1 1 d . . . . .
S16 S 0.64848(13) 0.76402(11) 0.44699(12) 0.0290(8) Uani 1 1 d . . . . .
S15 S 0.62384(11) 0.64429(10) 0.35215(11) 0.0195(7) Uani 1 1 d . . . . .
S14 S 0.59352(13) 0.53243(11) 0.25000(12) 0.0300(8) Uani 1 1 d . . . . .
S20 S 0.70084(15) 0.50760(12) 0.52293(14) 0.0427(9) Uani 1 1 d . . . . .
Zn1K Zn 0.61907(5) 0.73344(5) 0.36060(5) 0.0242(3) Uani 1 1 d . . . . .
Zn1J Zn 0.59209(6) 0.62074(5) 0.26249(5) 0.0261(4) Uani 1 1 d . . . . .
Zn1I Zn 0.71794(5) 0.61662(5) 0.39010(5) 0.0246(3) Uani 1 1 d . . . . .
Zn1H Zn 0.56539(5) 0.60496(4) 0.39652(5) 0.0202(3) Uani 1 1 d . . . . .
S21 S 0.69587(15) 0.40944(11) 0.28549(15) 0.0422(9) Uani 1 1 d . . . . .
S22 S 0.72735(13) 0.52739(11) 0.38502(12) 0.0288(8) Uani 1 1 d . . . . .
S23 S 0.75320(12) 0.64068(11) 0.47910(12) 0.0294(8) Uani 1 1 d . . . . .
S24 S 0.77979(15) 0.75920(15) 0.57866(14) 0.0520(10) Uani 1 1 d . . . . .
S25 S 0.75369(15) 0.53541(11) 0.24487(15) 0.0440(10) Uani 1 1 d . . . . .
S26 S 0.78219(13) 0.65018(11) 0.34956(13) 0.0323(8) Uani 1 1 d . . . . .
S27 S 0.80987(15) 0.77471(13) 0.44517(14) 0.0442(9) Uani 1 1 d . . . . .
S28 S 0.80783(16) 0.66501(12) 0.21056(16) 0.0508(10) Uani 1 1 d . . . . .
S29 S 0.86653(18) 0.78172(13) 0.17230(17) 0.0628(12) Uani 1 1 d . . . . .
S32 S 0.70377(16) 0.78916(12) 0.17630(14) 0.0461(10) Uani 1 1 d . . . . .
S31 S 0.62103(14) 0.74257(13) 0.58719(13) 0.0433(9) Uani 1 1 d . . . . .
S30 S 0.73047(17) 0.62123(14) 0.61905(14) 0.0527(10) Uani 1 1 d . . . . .
S33 S 0.83561(15) 0.78732(12) 0.31078(14) 0.0429(9) Uani 1 1 d . . . . .
 
loop_
 _atom_site_aniso_label
 _atom_site_aniso_U_11
 _atom_site_aniso_U_22
 _atom_site_aniso_U_33
 _atom_site_aniso_U_23
 _atom_site_aniso_U_13
 _atom_site_aniso_U_12
In01 0.0286(5) 0.0425(6) 0.0302(6) -0.0042(4) 0.0069(4) 0.0002(4)
In1 0.0444(6) 0.0358(6) 0.0418(6) 0.0057(5) 0.0175(5) -0.0014(4)
S1 0.039(2) 0.096(3) 0.036(2) 0.015(2) 0.0101(19) 0.027(2)
In02 0.0442(6) 0.0296(5) 0.0407(6) 0.0030(4) 0.0194(5) 0.0033(4)
In2 0.0385(6) 0.0638(7) 0.0368(7) -0.0107(5) 0.0061(5) -0.0100(5)
S2 0.029(2) 0.069(3) 0.066(3) -0.008(2) -0.0035(19) 0.0063(19)
In03 0.0308(6) 0.0439(6) 0.0325(6) 0.0027(5) 0.0054(5) 0.0099(4)
S3 0.032(2) 0.080(3) 0.032(2) 0.0024(19) 0.0005(17) 0.0152(19)
In04 0.0394(6) 0.0375(6) 0.0439(7) 0.0001(5) 0.0185(5) -0.0071(4)
S4 0.037(2) 0.072(3) 0.042(2) 0.018(2) 0.0057(18) 0.0165(19)
In05 0.0305(6) 0.0501(6) 0.0331(6) -0.0056(5) 0.0065(5) -0.0070(5)
S5 0.036(2) 0.036(2) 0.058(3) -0.0134(17) 0.0116(19) -0.0077(16)
In06 0.0400(6) 0.0310(5) 0.0465(7) -0.0039(5) 0.0188(5) -0.0045(4)
S6 0.0204(17) 0.0283(17) 0.0274(19) -0.0014(14) 0.0044(14) 0.0001(13)
In07 0.0365(6) 0.0399(6) 0.0346(6) 0.0016(4) 0.0094(5) 0.0003(4)
S7 0.036(2) 0.063(2) 0.027(2) -0.0087(17) 0.0103(17) 0.0112(17)
In08 0.0341(6) 0.0448(6) 0.0408(6) -0.0010(5) 0.0063(5) -0.0002(5)
S8 0.0263(18) 0.0348(19) 0.027(2) 0.0004(15) 0.0033(15) 0.0052(14)
In09 0.0484(6) 0.0288(5) 0.0511(7) 0.0002(5) 0.0292(5) -0.0013(4)
S9 0.0307(19) 0.0329(18) 0.0222(19) 0.0039(14) 0.0006(15) 0.0072(14)
In0A 0.0482(6) 0.0286(5) 0.0505(7) 0.0027(5) 0.0260(5) -0.0029(4)
In0C 0.0380(6) 0.0513(6) 0.0345(6) 0.0082(5) 0.0088(5) 0.0088(5)
In0D 0.0609(7) 0.0287(6) 0.0613(8) -0.0027(5) 0.0350(6) 0.0018(5)
In0F 0.0605(7) 0.0401(6) 0.0656(8) 0.0069(5) 0.0364(6) -0.0069(5)
In0G 0.0376(6) 0.0751(8) 0.0405(7) 0.0057(6) 0.0049(5) 0.0150(5)
S10 0.051(2) 0.046(2) 0.040(2) 0.0178(17) 0.0168(19) 0.0137(18)
S12 0.0342(19) 0.0172(16) 0.035(2) -0.0004(14) 0.0141(16) -0.0071(14)
S11 0.053(2) 0.0281(19) 0.071(3) -0.0071(18) 0.029(2) -0.0052(17)
S13 0.0299(19) 0.0304(18) 0.0207(18) 0.0007(14) 0.0104(15) -0.0040(14)
S19 0.078(3) 0.0236(19) 0.054(3) 0.0007(17) 0.026(2) 0.0105(18)
S18 0.040(2) 0.0260(18) 0.0268(19) 0.0044(14) 0.0108(16) -0.0002(15)
S17 0.039(2) 0.0289(18) 0.027(2) 0.0056(14) 0.0138(16) 0.0034(15)
S16 0.0255(18) 0.0335(18) 0.0245(19) -0.0047(15) 0.0026(15) -0.0023(14)
S15 0.0206(16) 0.0157(15) 0.0214(18) -0.0016(13) 0.0053(14) 0.0000(12)
S14 0.042(2) 0.0192(16) 0.033(2) -0.0032(14) 0.0171(16) -0.0026(14)
S20 0.051(2) 0.039(2) 0.039(2) 0.0086(17) 0.0147(18) 0.0056(17)
Zn1K 0.0238(8) 0.0288(8) 0.0213(8) -0.0001(6) 0.0088(7) 0.0014(6)
Zn1J 0.0292(8) 0.0241(8) 0.0268(9) 0.0037(6) 0.0111(7) 0.0030(6)
Zn1I 0.0241(8) 0.0236(8) 0.0290(9) -0.0004(6) 0.0123(7) -0.0005(6)
Zn1H 0.0207(8) 0.0181(7) 0.0232(8) -0.0011(6) 0.0087(6) -0.0011(6)
S21 0.060(2) 0.0135(17) 0.066(3) -0.0044(16) 0.038(2) -0.0028(16)
S22 0.0311(19) 0.0213(17) 0.038(2) 0.0027(14) 0.0161(16) 0.0051(14)
S23 0.0263(18) 0.0361(19) 0.0271(19) -0.0022(15) 0.0100(15) -0.0025(14)
S24 0.049(2) 0.075(3) 0.031(2) -0.0150(19) 0.0101(19) -0.026(2)
S25 0.056(2) 0.0219(18) 0.069(3) 0.0021(17) 0.041(2) -0.0013(16)
S26 0.0305(19) 0.0273(18) 0.043(2) -0.0002(15) 0.0166(16) -0.0030(14)
S27 0.043(2) 0.057(2) 0.035(2) -0.0138(18) 0.0168(18) -0.0210(18)
S28 0.064(3) 0.033(2) 0.070(3) 0.0064(18) 0.042(2) -0.0033(18)
S29 0.092(3) 0.030(2) 0.093(3) 0.002(2) 0.068(3) 0.000(2)
S32 0.062(3) 0.035(2) 0.052(3) 0.0098(17) 0.032(2) -0.0059(17)
S31 0.039(2) 0.057(2) 0.032(2) -0.0117(17) 0.0087(17) -0.0058(17)
S30 0.067(3) 0.060(2) 0.024(2) -0.0099(18) 0.0031(19) -0.002(2)
S33 0.054(2) 0.036(2) 0.047(2) -0.0009(17) 0.0277(19) -0.0167(17)
 
_geom_special_details
;
 All esds (except the esd in the dihedral angle between two l.s. planes)
 are estimated using the full covariance matrix.  The cell esds are taken
 into account individually in the estimation of esds in distances, angles
 and torsion angles; correlations between esds in cell parameters are only
 used when they are defined by crystal symmetry.  An approximate (isotropic)
 treatment of cell esds is used for estimating esds involving l.s. planes.
;
 
loop_
 _geom_bond_atom_site_label_1
 _geom_bond_atom_site_label_2
 _geom_bond_distance
 _geom_bond_site_symmetry_2
 _geom_bond_publ_flag
In01 S31 2.417(3) . ?
In01 S7 2.423(3) . ?
In01 S13 2.472(3) . ?
In01 S16 2.489(3) . ?
In1 S10 2.414(4) . ?
In1 S32 2.420(3) . ?
In1 S17 2.450(3) . ?
In1 S18 2.494(3) . ?
S1 In2 2.421(4) 4_575 ?
S1 In0G 2.425(4) . ?
In02 S20 2.407(4) . ?
In02 S19 2.429(3) . ?
In02 S12 2.462(3) . ?
In02 S22 2.486(3) . ?
In2 S1 2.421(4) 4_676 ?
In2 S30 2.436(4) . ?
In2 S31 2.444(4) . ?
In2 S24 2.472(4) . ?
S2 In08 2.417(4) . ?
S2 In0G 2.431(4) . ?
In03 S7 2.420(3) . ?
In03 S3 2.423(3) . ?
In03 S6 2.463(3) . ?
In03 S9 2.484(3) . ?
S3 In0G 2.454(4) . ?
In04 S27 2.412(3) . ?
In04 S33 2.430(3) . ?
In04 S26 2.459(3) . ?
In04 S18 2.483(3) . ?
S4 In0C 2.425(3) . ?
S4 In0G 2.459(4) . ?
In05 S27 2.419(3) . ?
In05 S24 2.431(4) . ?
In05 S16 2.451(3) . ?
In05 S23 2.472(3) . ?
S5 In08 2.412(3) . ?
S5 In06 2.421(4) . ?
In06 S11 2.431(3) . ?
In06 S12 2.464(3) . ?
In06 S14 2.471(3) . ?
S6 Zn1H 2.345(3) . ?
S6 In08 2.474(3) . ?
In07 S20 2.407(3) . ?
In07 S30 2.431(4) . ?
In07 S13 2.460(3) . ?
In07 S23 2.487(3) . ?
In08 S8 2.486(3) . ?
S8 Zn1J 2.352(3) . ?
S8 In0C 2.496(3) . ?
In09 S25 2.422(3) . ?
In09 S21 2.442(3) . ?
In09 S22 2.462(3) . ?
In09 S14 2.464(3) . ?
S9 Zn1K 2.338(3) . ?
S9 In0C 2.441(3) . ?
In0A S28 2.414(3) . ?
In0A S25 2.424(3) . ?
In0A S17 2.479(3) . ?
In0A S26 2.483(3) . ?
In0C S10 2.415(4) . ?
In0D S29 2.425(3) 2_645 ?
In0D S11 2.429(4) . ?
In0D S19 2.436(4) . ?
In0D S21 2.444(3) . ?
In0F S29 2.414(4) . ?
In0F S33 2.451(4) . ?
In0F S32 2.454(4) . ?
In0F S28 2.468(3) . ?
S12 Zn1H 2.357(3) . ?
S13 Zn1H 2.347(3) . ?
S18 Zn1K 2.362(3) . ?
S17 Zn1J 2.349(3) . ?
S16 Zn1K 2.337(3) . ?
S15 Zn1K 2.349(3) . ?
S15 Zn1I 2.353(3) . ?
S15 Zn1J 2.362(3) . ?
S15 Zn1H 2.364(3) . ?
S14 Zn1J 2.335(3) . ?
Zn1I S26 2.347(3) . ?
Zn1I S22 2.353(3) . ?
Zn1I S23 2.353(3) . ?
S29 In0D 2.425(3) 2_655 ?
 
loop_
 _geom_angle_atom_site_label_1
 _geom_angle_atom_site_label_2
 _geom_angle_atom_site_label_3
 _geom_angle
 _geom_angle_site_symmetry_1
 _geom_angle_site_symmetry_3
 _geom_angle_publ_flag
S31 In01 S7 105.65(12) . . ?
S31 In01 S13 109.61(11) . . ?
S7 In01 S13 109.29(11) . . ?
S31 In01 S16 110.78(11) . . ?
S7 In01 S16 108.89(11) . . ?
S13 In01 S16 112.39(10) . . ?
S10 In1 S32 105.79(12) . . ?
S10 In1 S17 113.89(12) . . ?
S32 In1 S17 111.29(11) . . ?
S10 In1 S18 107.65(12) . . ?
S32 In1 S18 108.32(12) . . ?
S17 In1 S18 109.67(10) . . ?
In2 S1 In0G 107.86(14) 4_575 . ?
S20 In02 S19 105.52(12) . . ?
S20 In02 S12 112.58(11) . . ?
S19 In02 S12 109.86(12) . . ?
S20 In02 S22 108.11(11) . . ?
S19 In02 S22 109.31(11) . . ?
S12 In02 S22 111.26(10) . . ?
S1 In2 S30 109.82(14) 4_676 . ?
S1 In2 S31 101.55(13) 4_676 . ?
S30 In2 S31 113.87(13) . . ?
S1 In2 S24 109.63(12) 4_676 . ?
S30 In2 S24 111.53(14) . . ?
S31 In2 S24 109.96(13) . . ?
In08 S2 In0G 105.86(14) . . ?
S7 In03 S3 105.07(12) . . ?
S7 In03 S6 109.66(11) . . ?
S3 In03 S6 108.15(12) . . ?
S7 In03 S9 108.54(11) . . ?
S3 In03 S9 112.46(12) . . ?
S6 In03 S9 112.66(10) . . ?
In03 S3 In0G 105.78(13) . . ?
S27 In04 S33 104.98(12) . . ?
S27 In04 S26 113.10(12) . . ?
S33 In04 S26 112.41(11) . . ?
S27 In04 S18 108.96(12) . . ?
S33 In04 S18 108.09(12) . . ?
S26 In04 S18 109.11(10) . . ?
In0C S4 In0G 107.29(13) . . ?
S27 In05 S24 106.01(12) . . ?
S27 In05 S16 111.12(12) . . ?
S24 In05 S16 109.96(12) . . ?
S27 In05 S23 108.91(11) . . ?
S24 In05 S23 109.51(12) . . ?
S16 In05 S23 111.20(10) . . ?
In08 S5 In06 104.39(12) . . ?
S5 In06 S11 106.06(12) . . ?
S5 In06 S12 111.10(11) . . ?
S11 In06 S12 110.31(12) . . ?
S5 In06 S14 108.87(12) . . ?
S11 In06 S14 108.86(11) . . ?
S12 In06 S14 111.48(10) . . ?
Zn1H S6 In03 108.19(11) . . ?
Zn1H S6 In08 108.69(12) . . ?
In03 S6 In08 106.82(11) . . ?
S20 In07 S30 105.35(12) . . ?
S20 In07 S13 110.31(11) . . ?
S30 In07 S13 113.73(12) . . ?
S20 In07 S23 110.00(11) . . ?
S30 In07 S23 107.77(12) . . ?
S13 In07 S23 109.56(10) . . ?
In03 S7 In01 103.60(12) . . ?
S5 In08 S2 105.93(13) . . ?
S5 In08 S6 109.55(12) . . ?
S2 In08 S6 113.64(12) . . ?
S5 In08 S8 110.58(11) . . ?
S2 In08 S8 107.69(13) . . ?
S6 In08 S8 109.40(10) . . ?
Zn1J S8 In08 107.95(12) . . ?
Zn1J S8 In0C 109.61(12) . . ?
In08 S8 In0C 108.75(12) . . ?
S25 In09 S21 105.56(11) . . ?
S25 In09 S22 109.58(12) . . ?
S21 In09 S22 108.87(11) . . ?
S25 In09 S14 110.16(12) . . ?
S21 In09 S14 110.21(11) . . ?
S22 In09 S14 112.23(10) . . ?
Zn1K S9 In0C 106.28(12) . . ?
Zn1K S9 In03 107.24(12) . . ?
In0C S9 In03 106.61(12) . . ?
S28 In0A S25 105.66(11) . . ?
S28 In0A S17 109.90(12) . . ?
S25 In0A S17 109.36(12) . . ?
S28 In0A S26 108.17(12) . . ?
S25 In0A S26 109.76(12) . . ?
S17 In0A S26 113.68(10) . . ?
S10 In0C S4 106.40(12) . . ?
S10 In0C S9 112.95(12) . . ?
S4 In0C S9 108.91(12) . . ?
S10 In0C S8 107.69(11) . . ?
S4 In0C S8 109.66(12) . . ?
S9 In0C S8 111.10(10) . . ?
S29 In0D S11 105.45(14) 2_645 . ?
S29 In0D S19 105.38(14) 2_645 . ?
S11 In0D S19 117.00(13) . . ?
S29 In0D S21 109.74(11) 2_645 . ?
S11 In0D S21 109.34(13) . . ?
S19 In0D S21 109.65(13) . . ?
S29 In0F S33 110.42(14) . . ?
S29 In0F S32 113.20(14) . . ?
S33 In0F S32 111.39(12) . . ?
S29 In0F S28 96.95(12) . . ?
S33 In0F S28 112.54(13) . . ?
S32 In0F S28 111.61(13) . . ?
S1 In0G S2 109.30(14) . . ?
S1 In0G S3 99.99(13) . . ?
S2 In0G S3 112.53(14) . . ?
S1 In0G S4 112.19(13) . . ?
S2 In0G S4 111.39(14) . . ?
S3 In0G S4 110.94(13) . . ?
In1 S10 In0C 103.42(12) . . ?
Zn1H S12 In02 106.54(11) . . ?
Zn1H S12 In06 106.93(12) . . ?
In02 S12 In06 109.08(12) . . ?
In0D S11 In06 105.79(13) . . ?
Zn1H S13 In07 108.95(12) . . ?
Zn1H S13 In01 108.33(12) . . ?
In07 S13 In01 106.81(11) . . ?
In02 S19 In0D 105.52(14) . . ?
Zn1K S18 In04 109.44(12) . . ?
Zn1K S18 In1 110.15(13) . . ?
In04 S18 In1 110.42(12) . . ?
Zn1J S17 In1 106.09(12) . . ?
Zn1J S17 In0A 106.81(12) . . ?
In1 S17 In0A 107.24(12) . . ?
Zn1K S16 In05 106.75(12) . . ?
Zn1K S16 In01 107.02(12) . . ?
In05 S16 In01 106.19(12) . . ?
Zn1K S15 Zn1I 109.62(11) . . ?
Zn1K S15 Zn1J 110.19(12) . . ?
Zn1I S15 Zn1J 109.72(11) . . ?
Zn1K S15 Zn1H 109.12(11) . . ?
Zn1I S15 Zn1H 109.04(12) . . ?
Zn1J S15 Zn1H 109.13(11) . . ?
Zn1J S14 In09 107.78(12) . . ?
Zn1J S14 In06 108.16(12) . . ?
In09 S14 In06 106.94(12) . . ?
In07 S20 In02 104.40(13) . . ?
S16 Zn1K S9 102.96(12) . . ?
S16 Zn1K S15 115.13(11) . . ?
S9 Zn1K S15 114.95(11) . . ?
S16 Zn1K S18 107.70(12) . . ?
S9 Zn1K S18 107.34(12) . . ?
S15 Zn1K S18 108.28(11) . . ?
S14 Zn1J S17 104.48(11) . . ?
S14 Zn1J S8 108.26(12) . . ?
S17 Zn1J S8 105.84(12) . . ?
S14 Zn1J S15 112.80(11) . . ?
S17 Zn1J S15 114.33(11) . . ?
S8 Zn1J S15 110.64(11) . . ?
S26 Zn1I S22 104.57(11) . . ?
S26 Zn1I S23 105.62(12) . . ?
S22 Zn1I S23 108.08(12) . . ?
S26 Zn1I S15 113.98(11) . . ?
S22 Zn1I S15 112.48(11) . . ?
S23 Zn1I S15 111.57(11) . . ?
S6 Zn1H S13 106.15(11) . . ?
S6 Zn1H S12 105.82(11) . . ?
S13 Zn1H S12 106.03(11) . . ?
S6 Zn1H S15 112.43(11) . . ?
S13 Zn1H S15 112.24(11) . . ?
S12 Zn1H S15 113.59(11) . . ?
In09 S21 In0D 106.78(12) . . ?
Zn1I S22 In09 108.01(12) . . ?
Zn1I S22 In02 107.56(11) . . ?
In09 S22 In02 107.15(12) . . ?
Zn1I S23 In05 109.44(12) . . ?
Zn1I S23 In07 107.43(12) . . ?
In05 S23 In07 108.99(11) . . ?
In05 S24 In2 106.32(13) . . ?
In09 S25 In0A 102.16(12) . . ?
Zn1I S26 In04 106.49(12) . . ?
Zn1I S26 In0A 106.95(12) . . ?
In04 S26 In0A 107.59(12) . . ?
In04 S27 In05 103.50(12) . . ?
In0A S28 In0F 106.72(13) . . ?
In0F S29 In0D 106.82(14) . 2_655 ?
In1 S32 In0F 106.40(13) . . ?
In01 S31 In2 106.46(13) . . ?
In07 S30 In2 105.15(14) . . ?
In04 S33 In0F 105.42(13) . . ?
 
_refine_diff_density_max    1.779
_refine_diff_density_min   -1.199
_refine_diff_density_rms    0.178
loop_
  _platon_squeeze_void_nr
  _platon_squeeze_void_average_x
  _platon_squeeze_void_average_y
  _platon_squeeze_void_average_z
  _platon_squeeze_void_volume
  _platon_squeeze_void_count_electrons
  _platon_squeeze_void_content
   1 -0.005 -0.019  0.003     11438      4013 ' '
_platon_squeeze_details                           ?

 
data_OCF-100_sqd
 
_audit_creation_method            'SHELXL-2014/7'
_shelx_SHELXL_version_number      '2014/7'
_chemical_name_systematic         ?
_chemical_name_common             ?
_chemical_melting_point           ?
_chemical_formula_moiety          'In26 O S41 Zn2 solvent'
_chemical_formula_sum             'In26 O S41 Zn2 solvent' 
_chemical_formula_weight          4446.57
loop_
 _atom_type_symbol
 _atom_type_description
 _atom_type_scat_dispersion_real
 _atom_type_scat_dispersion_imag
 _atom_type_scat_source
 'C'  'C'   0.0033   0.0016
 'International Tables Vol C Tables 4.2.6.8 and 6.1.1.4'
 'In'  'In'  -0.7276   1.3100
 'International Tables Vol C Tables 4.2.6.8 and 6.1.1.4'
 'N'  'N'   0.0061   0.0033
 'International Tables Vol C Tables 4.2.6.8 and 6.1.1.4'
 'O'  'O'   0.0106   0.0060
 'International Tables Vol C Tables 4.2.6.8 and 6.1.1.4'
 'S'  'S'   0.1246   0.1234
 'International Tables Vol C Tables 4.2.6.8 and 6.1.1.4'
 'Se'  'Se'  -0.0929   2.2259
 'International Tables Vol C Tables 4.2.6.8 and 6.1.1.4'
 'Cr'  'Cr'   0.3209   0.6236
 'International Tables Vol C Tables 4.2.6.8 and 6.1.1.4'
 'Zn'  'Zn'   0.2839   1.4301
 'International Tables Vol C Tables 4.2.6.8 and 6.1.1.4'
 
_space_group_crystal_system       monoclinic
_space_group_IT_number            15
_space_group_name_H-M_alt         'C 2/c'
_space_group_name_Hall            '-C 2yc'
 
_shelx_space_group_comment
;
The symmetry employed for this shelxl refinement is uniquely defined
by the following loop, which should always be used as a source of
symmetry information in preference to the above space-group names.
They are only intended as comments.
;
 
loop_
 _space_group_symop_operation_xyz
 'x, y, z'
 '-x, y, -z+1/2'
 'x+1/2, y+1/2, z'
 '-x+1/2, y+1/2, -z+1/2'
 '-x, -y, -z'
 'x, -y, z-1/2'
 '-x+1/2, -y+1/2, -z'
 'x+1/2, -y+1/2, z-1/2'
 
_cell_length_a                    32.738(4)
_cell_length_b                    32.736(4)
_cell_length_c                    27.371(3)
_cell_angle_alpha                 90
_cell_angle_beta                  119.826(3)
_cell_angle_gamma                 90
_cell_volume                      25448(6)
_cell_formula_units_Z             8
_cell_measurement_temperature     296(2)
_cell_measurement_reflns_used     17281
_cell_measurement_theta_min       4.615
_cell_measurement_theta_max       46.523
 
_exptl_crystal_description        'BLOCK'
_exptl_crystal_colour             'PALE YELLOW'
_exptl_crystal_density_meas       ?
_exptl_crystal_density_method     'not measured'
_exptl_crystal_density_diffrn     2.321          
_exptl_crystal_F_000              15984.0
_exptl_transmission_factor_min    ?
_exptl_transmission_factor_max    ?
_exptl_crystal_size_max           ?
_exptl_crystal_size_mid           ?
_exptl_crystal_size_min           ?
_exptl_absorpt_coefficient_mu     5.657
_shelx_estimated_absorpt_T_min    ?
_shelx_estimated_absorpt_T_max    ?
_exptl_absorpt_correction_type    'MULTI-SCAN'
_exptl_absorpt_correction_T_min   0.6087
_exptl_absorpt_correction_T_max   0.7449
_exptl_absorpt_process_details    ?
_exptl_absorpt_special_details    ?
_diffrn_ambient_temperature       296(2)
_diffrn_radiation_wavelength      0.71073
_diffrn_radiation_type            MoK\a
_diffrn_source                    'fine-focus sealed tube'
_diffrn_measurement_device_type   'Bruker Photon II CPAD diffractometer'
_diffrn_measurement_method        'OMEGA-PHI SCAN'
_diffrn_detector_area_resol_mean  ?
_diffrn_reflns_number             183882
_diffrn_reflns_av_unetI/netI      0.0631
_diffrn_reflns_av_R_equivalents   0.1120
_diffrn_reflns_limit_h_min        -36
_diffrn_reflns_limit_h_max        36
_diffrn_reflns_limit_k_min        -36
_diffrn_reflns_limit_k_max        36
_diffrn_reflns_limit_l_min        -30
_diffrn_reflns_limit_l_max        30
_diffrn_reflns_theta_min          2.119
_diffrn_reflns_theta_max          23.372
_diffrn_reflns_theta_full         23.372
_diffrn_measured_fraction_theta_max   0.357
_diffrn_measured_fraction_theta_full  0.996
_diffrn_reflns_Laue_measured_fraction_max    0.357
_diffrn_reflns_Laue_measured_fraction_full   0.996
_diffrn_reflns_point_group_measured_fraction_max   0.357
_diffrn_reflns_point_group_measured_fraction_full  0.996
_reflns_number_total              18555
_reflns_number_gt                 9308
_reflns_threshold_expression      'I > 2\s(I)'
_reflns_Friedel_coverage          0.000
_reflns_Friedel_fraction_max      .
_reflns_Friedel_fraction_full     .
 
_reflns_special_details
;
 Reflections were merged by SHELXL according to the crystal
 class for the calculation of statistics and refinement.
 
 _reflns_Friedel_fraction is defined as the number of unique
 Friedel pairs measured divided by the number that would be
 possible theoretically, ignoring centric projections and
 systematic absences.
;
 
_computing_data_collection        ?
_computing_cell_refinement        ?
_computing_data_reduction         ?
_computing_structure_solution     ?
_computing_structure_refinement 'SHELXL-2014/7 (Sheldrick, 2014)'
_computing_molecular_graphics     ?
_computing_publication_material   ?
_refine_special_details
;
 Refined as a 2-component inversion twin.
;
_refine_ls_structure_factor_coef  Fsqd
_refine_ls_matrix_type            full
_refine_ls_weighting_scheme       calc
_refine_ls_weighting_details
'w=1/[\s^2^(Fo^2^)+(0.2464P)^2^+287.3017P] where P=(Fo^2^+2Fc^2^)/3'
_atom_sites_solution_primary      ?
_atom_sites_solution_secondary    ?
_atom_sites_solution_hydrogens    .
_refine_ls_hydrogen_treatment     undef
_refine_ls_extinction_method      none
_refine_ls_extinction_coef        .
_refine_ls_number_reflns          18425
_refine_ls_number_parameters      643
_refine_ls_number_restraints      1278
_refine_ls_R_factor_all           0.1716
_refine_ls_R_factor_gt            0.1039
_refine_ls_wR_factor_ref          0.4151
_refine_ls_wR_factor_gt           0.3667
_refine_ls_goodness_of_fit_ref    1.070
_refine_ls_restrained_S_all       1.056
_refine_ls_shift/su_max           0.001
_refine_ls_shift/su_mean          0.000
 
loop_
 _atom_site_label
 _atom_site_type_symbol
 _atom_site_fract_x
 _atom_site_fract_y
 _atom_site_fract_z
 _atom_site_U_iso_or_equiv
 _atom_site_adp_type
 _atom_site_occupancy
 _atom_site_site_symmetry_order  
 _atom_site_calc_flag
 _atom_site_refinement_flags_posn
 _atom_site_refinement_flags_adp
 _atom_site_refinement_flags_occupancy
 _atom_site_disorder_assembly
 _atom_site_disorder_group
In1 In 0.82833(6) 0.43781(6) 1.03800(8) 0.0311(5) Uani 1 1 d . U . . .
O1 O 0.8701(7) 0.4405(6) 0.9334(8) 0.046(4) Uani 1 1 d . U . . .
Zn1 Zn 0.43423(7) 0.60432(7) 0.69209(9) 0.0076(5) Uani 1 1 d . U . . .
In2 In 0.69560(5) 0.43688(5) 0.92147(6) 0.0159(4) Uani 1 1 d . U . . .
Zn2 Zn 0.48271(7) 0.68735(7) 0.80803(9) 0.0084(5) Uani 1 1 d . U . . .
In3 In 0.78072(5) 0.52228(5) 0.92156(6) 0.0220(4) Uani 1 1 d . U . . .
In4 In 0.74544(5) 0.52127(5) 1.03965(6) 0.0187(4) Uani 1 1 d . U . . .
In5 In 0.66168(5) 0.60440(5) 1.03831(6) 0.0180(4) Uani 1 1 d . U . . .
In8 In 0.56503(5) 0.43678(5) 0.80692(6) 0.0171(4) Uani 1 1 d . U . . .
In10 In 0.73306(5) 0.60472(5) 0.80681(7) 0.0207(4) Uani 1 1 d . U . . .
In20 In 0.36227(6) 0.76982(5) 0.92229(7) 0.0250(4) Uani 1 1 d . U . . .
In21 In 0.31444(6) 0.68722(5) 0.80731(7) 0.0254(4) Uani 1 1 d . U . . .
In23 In 0.91194(6) 0.35416(5) 1.03842(7) 0.0249(4) Uani 1 1 d . U . . .
In24 In 0.99625(6) 0.27049(5) 1.03991(7) 0.0249(4) Uani 1 1 d . U . . .
In25 In 0.94828(7) 0.35589(6) 0.92272(8) 0.0415(5) Uani 1 1 d . U . . .
In26 In 0.98220(7) 0.35567(6) 0.80704(8) 0.0369(5) Uani 1 1 d . U . . .
In28 In 1.07889(5) 0.18724(5) 1.03897(7) 0.0202(4) Uani 1 1 d . U . . .
In14 In 0.51794(7) 0.52087(7) 0.69196(8) 0.0422(5) Uani 0.125 1 d . U P A 1
In12 In 0.61385(7) 0.68805(6) 0.92082(9) 0.0432(5) Uani 0.125 1 d . U P B 1
In9 In 0.64712(8) 0.52223(7) 0.80572(10) 0.0534(6) Uani 0.125 1 d . U P A 1
In27 In 1.03064(7) 0.26991(7) 0.92104(9) 0.0462(6) Uani 0.125 1 d . U P C 1
In7 In 0.69551(8) 0.60539(8) 0.92096(10) 0.0586(7) Uani 0.125 1 d . U P B 1
In6 In 0.61169(8) 0.52256(8) 0.92107(10) 0.0576(7) Uani 0.125 1 d . U P D 1
In13 In 0.64949(7) 0.68821(7) 0.80861(9) 0.0466(6) Uani 0.125 1 d . U P B 1
In22 In 0.39929(8) 0.77053(8) 0.80599(10) 0.0581(7) Uani 0.125 1 d . U P E 1
In18 In 0.565(2) 0.775(2) 0.813(4) 0.030(7) Uani 0.125 1 d . U P B 1
In11 In 0.52957(7) 0.60334(6) 0.92154(8) 0.0423(5) Uani 0.125 1 d . U P B 1
In16 In 0.44723(8) 0.68646(7) 0.92125(10) 0.0521(6) Uani 0.125 1 d . U P E 1
In15 In 0.60090(6) 0.60365(6) 0.69179(8) 0.0343(5) Uani 0.125 1 d . U P A 1
Zn14 In 0.51794(7) 0.52087(7) 0.69196(8) 0.0422(5) Uani 0.875 1 d . U P A 2
Zn12 In 0.61385(7) 0.68805(6) 0.92082(9) 0.0432(5) Uani 0.875 1 d . U P B 2
Zn9 In 0.64712(8) 0.52223(7) 0.80572(10) 0.0534(6) Uani 0.875 1 d . U P A 2
Zn27 In 1.03064(7) 0.26991(7) 0.92104(9) 0.0462(6) Uani 0.875 1 d . U P C 2
Zn7 In 0.69551(8) 0.60539(8) 0.92096(10) 0.0586(7) Uani 0.875 1 d . U P B 2
Zn6 In 0.61169(8) 0.52256(8) 0.92107(10) 0.0576(7) Uani 0.875 1 d . U P D 2
Zn13 In 0.64949(7) 0.68821(7) 0.80861(9) 0.0466(6) Uani 0.875 1 d . U P B 2
Zn22 In 0.39929(8) 0.77053(8) 0.80599(10) 0.0581(7) Uani 0.875 1 d . U P E 2
Zn18 In 0.5669(4) 0.7703(3) 0.8076(5) 0.0388(16) Uani 0.875 1 d . U P B 2
Zn11 In 0.52957(7) 0.60334(6) 0.92154(8) 0.0423(5) Uani 0.875 1 d . U P B 2
Zn16 In 0.44723(8) 0.68646(7) 0.92125(10) 0.0521(6) Uani 0.875 1 d . U P E 2
Zn15 In 0.60090(6) 0.60365(6) 0.69179(8) 0.0343(5) Uani 0.875 1 d . U P A 2
S16 S 0.5000 0.5625(3) 0.7500 0.0221(18) Uani 1 2 d S TU P . .
S11 S 0.5000 0.7270(2) 0.7500 0.0233(18) Uani 1 2 d S TU P . .
S6 S 0.3826(2) 0.64264(19) 0.8695(3) 0.0283(14) Uani 1 1 d . U . . .
S9 S 0.50944(17) 0.64434(16) 0.9780(2) 0.0143(11) Uani 1 1 d . U . . .
S13 S 0.46313(18) 0.56017(17) 0.8654(2) 0.0188(13) Uani 1 1 d . U . . .
S22 S 0.59251(16) 0.55997(15) 0.9767(2) 0.0102(11) Uani 1 1 d . U . . .
S14 S 0.54783(17) 0.64686(17) 0.8634(2) 0.0154(12) Uani 1 1 d . U . . .
S10 S 0.41704(18) 0.64565(17) 0.7478(2) 0.0180(12) Uani 1 1 d . U . . .
S15 S 0.6345(2) 0.73022(19) 0.8668(3) 0.0267(14) Uani 1 1 d . U . . .
S12 S 0.37022(19) 0.56333(18) 0.6369(2) 0.0191(13) Uani 1 1 d . U . . .
S23 S 0.6830(2) 0.6499(2) 0.9819(3) 0.0351(15) Uani 1 1 d . U . . .
S33 S 0.8974(2) 0.3956(2) 1.1029(3) 0.0434(18) Uani 1 1 d . U . . .
S18 S 0.58435(19) 0.47893(19) 0.7470(3) 0.0253(13) Uani 1 1 d . U . . .
S20 S 0.54698(18) 0.48056(18) 0.8681(2) 0.0210(13) Uani 1 1 d . U . . .
S19 S 0.66552(18) 0.56031(18) 0.7476(2) 0.0220(13) Uani 1 1 d . U . . .
S21 S 0.7159(2) 0.64715(19) 0.8683(3) 0.0276(14) Uani 1 1 d . U . . .
S32 S 0.8462(2) 0.4784(2) 0.9764(2) 0.0256(13) Uani 1 1 d . U . . .
S2 S 0.3774(2) 0.8121(2) 0.8574(3) 0.0339(15) Uani 1 1 d . U . . .
S28 S 0.76227(16) 0.56722(16) 0.9792(2) 0.0119(11) Uani 1 1 d . U . . .
S8 S 0.4292(2) 0.7235(2) 0.9811(3) 0.0354(16) Uani 1 1 d . U . . .
S30 S 0.8124(3) 0.4791(2) 1.1021(3) 0.0427(17) Uani 1 1 d . U . . .
S25 S 0.71244(19) 0.47929(17) 0.8587(2) 0.0186(12) Uani 1 1 d . U . . .
S24 S 0.62983(18) 0.39177(17) 0.8641(2) 0.0201(13) Uani 1 1 d . U . . .
S27 S 0.6756(2) 0.47741(18) 0.9823(2) 0.0242(13) Uani 1 1 d . U . . .
S29 S 0.7294(2) 0.5632(2) 1.1023(3) 0.0323(15) Uani 1 1 d . U . . .
S31 S 0.7618(3) 0.3929(3) 0.9809(3) 0.052(2) Uani 1 1 d . U . . .
S26 S 0.8035(2) 0.5647(2) 0.8652(3) 0.0316(15) Uani 1 1 d . U . . .
S17 S 0.5000 0.3921(2) 0.7500 0.0230(19) Uani 1 2 d S TU P . .
S3 S 0.2447(2) 0.6467(2) 0.7491(3) 0.0329(15) Uani 1 1 d . U . . .
S4 S 0.33167(19) 0.73230(17) 0.7469(2) 0.0193(12) Uani 1 1 d . U . . .
S1 S 0.2941(2) 0.7290(2) 0.8646(3) 0.0434(18) Uani 1 1 d . U . . .
S7 S 0.46576(19) 0.72813(19) 0.8660(2) 0.0217(13) Uani 1 1 d . U . . .
S43 S 1.1459(2) 0.14613(19) 1.0993(3) 0.0270(14) Uani 1 1 d . U . . .
S42 S 1.1013(2) 0.2292(2) 0.9812(3) 0.0379(16) Uani 1 1 d . U . . .
S40 S 1.04975(19) 0.31487(18) 0.8656(2) 0.0212(13) Uani 1 1 d . U . . .
S41 S 1.0636(2) 0.22780(19) 1.1013(2) 0.0282(14) Uani 1 1 d . U . . .
S39 S 1.0166(2) 0.31303(19) 0.9790(3) 0.0295(14) Uani 1 1 d . U . . .
S38 S 0.9801(2) 0.3122(2) 1.1004(3) 0.0342(16) Uani 1 1 d . U . . .
S36 S 0.9644(3) 0.4010(2) 0.8654(3) 0.0471(19) Uani 1 1 d . U . . .
S35 S 0.9301(2) 0.3999(2) 0.9795(3) 0.0352(15) Uani 1 1 d . U . . .
S37 S 1.0000 0.4004(3) 0.7500 0.045(3) Uani 1 2 d S TU P . .
S5 S 0.4124(2) 0.8140(2) 0.7455(3) 0.0348(16) Uani 1 1 d . U . . .
S34 S 0.8422(2) 0.3105(2) 0.9796(3) 0.0404(17) Uani 1 1 d . U . . .
 
loop_
 _atom_site_aniso_label
 _atom_site_aniso_U_11
 _atom_site_aniso_U_22
 _atom_site_aniso_U_33
 _atom_site_aniso_U_23
 _atom_site_aniso_U_13
 _atom_site_aniso_U_12
In1 0.0274(10) 0.0304(11) 0.0327(10) 0.0025(8) 0.0129(8) 0.0125(8)
O1 0.056(9) 0.047(8) 0.040(8) 0.007(6) 0.028(7) 0.008(7)
Zn1 0.0070(11) 0.0080(12) 0.0056(12) -0.0027(10) 0.0015(10) -0.0036(9)
In2 0.0166(8) 0.0144(8) 0.0170(8) 0.0041(7) 0.0086(7) 0.0084(6)
Zn2 0.0115(12) 0.0099(13) 0.0047(12) -0.0001(9) 0.0047(10) 0.0001(9)
In3 0.0217(9) 0.0235(9) 0.0184(9) 0.0005(7) 0.0082(7) 0.0066(7)
In4 0.0159(8) 0.0195(9) 0.0183(8) 0.0023(7) 0.0068(7) 0.0080(7)
In5 0.0200(8) 0.0185(9) 0.0164(8) 0.0009(7) 0.0098(7) 0.0021(7)
In8 0.0186(8) 0.0134(8) 0.0184(8) 0.0027(7) 0.0085(7) 0.0034(6)
In10 0.0203(9) 0.0235(9) 0.0217(9) -0.0018(7) 0.0129(7) -0.0006(7)
In20 0.0269(9) 0.0238(10) 0.0293(10) -0.0044(8) 0.0178(8) 0.0020(7)
In21 0.0236(9) 0.0276(10) 0.0272(10) -0.0023(8) 0.0142(8) 0.0003(7)
In23 0.0277(9) 0.0269(10) 0.0220(9) -0.0027(8) 0.0137(8) 0.0120(7)
In24 0.0244(9) 0.0263(10) 0.0242(9) -0.0013(7) 0.0122(8) 0.0080(7)
In25 0.0458(12) 0.0389(12) 0.0441(12) -0.0020(10) 0.0255(10) 0.0074(9)
In26 0.0443(12) 0.0316(11) 0.0366(11) 0.0018(9) 0.0214(10) 0.0008(9)
In28 0.0204(9) 0.0209(9) 0.0205(9) -0.0030(7) 0.0110(7) 0.0027(7)
In14 0.0435(12) 0.0414(12) 0.0449(12) -0.0042(10) 0.0244(10) 0.0034(9)
In12 0.0396(12) 0.0417(12) 0.0478(13) -0.0009(10) 0.0214(10) 0.0012(9)
In9 0.0530(13) 0.0559(15) 0.0501(14) 0.0010(11) 0.0247(11) -0.0005(11)
In27 0.0466(13) 0.0477(13) 0.0453(13) -0.0007(10) 0.0235(11) 0.0043(10)
In7 0.0610(15) 0.0575(15) 0.0600(15) 0.0089(12) 0.0322(13) 0.0084(12)
In6 0.0521(14) 0.0573(15) 0.0629(15) -0.0086(12) 0.0282(12) 0.0009(11)
In13 0.0454(13) 0.0458(13) 0.0461(13) -0.0037(10) 0.0209(11) -0.0025(10)
In22 0.0604(15) 0.0589(15) 0.0548(14) -0.0030(12) 0.0284(12) 0.0043(12)
In18 0.026(9) 0.025(9) 0.030(13) -0.004(7) 0.007(8) -0.004(6)
In11 0.0443(12) 0.0422(12) 0.0397(12) 0.0027(10) 0.0203(10) 0.0064(9)
In16 0.0502(13) 0.0523(14) 0.0541(14) -0.0003(11) 0.0261(11) 0.0063(11)
In15 0.0345(11) 0.0379(12) 0.0317(11) 0.0018(9) 0.0173(9) 0.0012(9)
Zn14 0.0435(12) 0.0414(12) 0.0449(12) -0.0042(10) 0.0244(10) 0.0034(9)
Zn12 0.0396(12) 0.0417(12) 0.0478(13) -0.0009(10) 0.0214(10) 0.0012(9)
Zn9 0.0530(13) 0.0559(15) 0.0501(14) 0.0010(11) 0.0247(11) -0.0005(11)
Zn27 0.0466(13) 0.0477(13) 0.0453(13) -0.0007(10) 0.0235(11) 0.0043(10)
Zn7 0.0610(15) 0.0575(15) 0.0600(15) 0.0089(12) 0.0322(13) 0.0084(12)
Zn6 0.0521(14) 0.0573(15) 0.0629(15) -0.0086(12) 0.0282(12) 0.0009(11)
Zn13 0.0454(13) 0.0458(13) 0.0461(13) -0.0037(10) 0.0209(11) -0.0025(10)
Zn22 0.0604(15) 0.0589(15) 0.0548(14) -0.0030(12) 0.0284(12) 0.0043(12)
Zn18 0.0416(19) 0.037(3) 0.038(3) -0.001(2) 0.0200(17) 0.0051(19)
Zn11 0.0443(12) 0.0422(12) 0.0397(12) 0.0027(10) 0.0203(10) 0.0064(9)
Zn16 0.0502(13) 0.0523(14) 0.0541(14) -0.0003(11) 0.0261(11) 0.0063(11)
Zn15 0.0345(11) 0.0379(12) 0.0317(11) 0.0018(9) 0.0173(9) 0.0012(9)
S16 0.022(4) 0.020(4) 0.026(4) 0.000 0.014(3) 0.000
S11 0.035(4) 0.013(4) 0.025(4) 0.000 0.017(3) 0.000
S6 0.035(3) 0.024(3) 0.027(3) -0.003(2) 0.016(2) 0.000(2)
S9 0.012(2) 0.016(3) 0.016(2) -0.011(2) 0.007(2) -0.0048(19)
S13 0.012(2) 0.011(3) 0.034(3) -0.003(2) 0.013(2) 0.006(2)
S22 0.007(2) 0.008(2) 0.011(2) -0.0027(19) 0.0009(19) 0.0026(18)
S14 0.011(2) 0.019(3) 0.015(2) 0.000(2) 0.006(2) 0.0037(19)
S10 0.018(3) 0.017(3) 0.021(3) -0.003(2) 0.011(2) -0.003(2)
S15 0.024(3) 0.023(3) 0.033(3) 0.000(2) 0.014(2) -0.003(2)
S12 0.018(3) 0.022(3) 0.019(3) -0.004(2) 0.010(2) -0.005(2)
S23 0.033(3) 0.036(3) 0.031(3) -0.012(2) 0.012(3) -0.003(2)
S33 0.046(4) 0.042(4) 0.028(3) -0.007(3) 0.009(3) 0.019(3)
S18 0.020(3) 0.019(3) 0.036(3) -0.002(2) 0.013(2) -0.002(2)
S20 0.019(3) 0.017(3) 0.025(3) 0.001(2) 0.010(2) 0.005(2)
S19 0.013(3) 0.027(3) 0.031(3) 0.007(2) 0.016(2) 0.003(2)
S21 0.030(3) 0.025(3) 0.025(3) 0.004(2) 0.012(2) -0.002(2)
S32 0.025(3) 0.035(3) 0.017(3) 0.010(2) 0.011(2) 0.014(2)
S2 0.037(3) 0.030(3) 0.035(3) -0.002(3) 0.018(3) 0.001(3)
S28 0.007(2) 0.012(2) 0.015(2) 0.004(2) 0.004(2) 0.0025(19)
S8 0.036(3) 0.039(3) 0.032(3) -0.004(3) 0.017(3) 0.005(3)
S30 0.052(4) 0.047(4) 0.030(3) 0.004(3) 0.022(3) 0.021(3)
S25 0.025(3) 0.013(3) 0.019(3) 0.000(2) 0.012(2) 0.004(2)
S24 0.011(2) 0.017(3) 0.026(3) 0.001(2) 0.005(2) 0.001(2)
S27 0.034(3) 0.023(3) 0.019(3) 0.000(2) 0.016(2) 0.001(2)
S29 0.038(3) 0.040(3) 0.023(3) 0.005(3) 0.018(3) 0.012(3)
S31 0.045(4) 0.058(4) 0.032(3) 0.003(3) 0.003(3) 0.009(3)
S26 0.022(3) 0.041(4) 0.034(3) 0.002(3) 0.015(3) -0.001(2)
S17 0.023(4) 0.005(3) 0.036(4) 0.000 0.011(3) 0.000
S3 0.027(3) 0.034(3) 0.041(3) -0.017(3) 0.020(3) -0.007(3)
S4 0.024(3) 0.014(3) 0.020(3) -0.002(2) 0.012(2) 0.009(2)
S1 0.042(4) 0.046(4) 0.047(4) -0.009(3) 0.026(3) -0.001(3)
S7 0.018(3) 0.028(3) 0.018(3) -0.002(2) 0.007(2) 0.002(2)
S43 0.022(3) 0.027(3) 0.028(3) -0.006(3) 0.009(2) 0.011(2)
S42 0.036(3) 0.040(4) 0.039(3) 0.002(3) 0.019(3) 0.017(3)
S40 0.025(3) 0.019(3) 0.029(3) -0.005(2) 0.021(3) -0.003(2)
S41 0.030(3) 0.030(3) 0.026(3) 0.002(2) 0.015(3) 0.014(3)
S39 0.034(3) 0.024(3) 0.034(3) -0.010(2) 0.019(3) 0.003(2)
S38 0.036(3) 0.034(3) 0.026(3) 0.001(3) 0.010(3) 0.019(3)
S36 0.062(4) 0.044(4) 0.044(4) 0.000(3) 0.033(3) 0.016(3)
S35 0.050(4) 0.035(3) 0.025(3) -0.004(3) 0.022(3) 0.009(3)
S37 0.055(5) 0.038(5) 0.056(5) 0.000 0.037(4) 0.000
S5 0.034(3) 0.039(4) 0.031(3) 0.001(3) 0.016(3) 0.007(3)
S34 0.032(3) 0.047(4) 0.036(3) -0.010(3) 0.013(3) 0.013(3)
 
_geom_special_details
;
 All esds (except the esd in the dihedral angle between two l.s. planes)
 are estimated using the full covariance matrix.  The cell esds are taken
 into account individually in the estimation of esds in distances, angles
 and torsion angles; correlations between esds in cell parameters are only
 used when they are defined by crystal symmetry.  An approximate (isotropic)
 treatment of cell esds is used for estimating esds involving l.s. planes.
;
 
loop_
 _geom_bond_atom_site_label_1
 _geom_bond_atom_site_label_2
 _geom_bond_distance
 _geom_bond_site_symmetry_2
 _geom_bond_publ_flag
In1 S32 2.437(6) . ?
In1 S31 2.442(8) . ?
In1 S30 2.466(7) . ?
In1 S33 2.486(7) . ?
O1 S32 2.109(19) . ?
O1 S35 2.183(19) . ?
Zn1 S10 2.307(6) . ?
Zn1 S12 2.308(6) . ?
Zn1 S14 2.341(6) 2_656 ?
Zn1 S16 2.373(5) . ?
In2 S31 2.431(8) . ?
In2 S24 2.433(6) . ?
In2 S27 2.457(6) . ?
In2 S25 2.474(6) . ?
Zn2 S14 2.321(6) . ?
Zn2 S11 2.329(5) . ?
Zn2 S7 2.342(6) . ?
Zn2 S10 2.383(6) . ?
In3 S32 2.390(6) . ?
In3 S28 2.443(5) . ?
In3 S26 2.451(7) . ?
In3 S25 2.472(6) . ?
In4 S30 2.430(7) . ?
In4 S29 2.450(6) . ?
In4 S27 2.486(6) . ?
In4 S28 2.492(5) . ?
In5 S43 2.404(6) 3_455 ?
In5 S29 2.437(6) . ?
In5 S23 2.481(7) . ?
In5 S22 2.508(5) . ?
In8 S17 2.408(5) . ?
In8 S24 2.412(5) . ?
In8 S18 2.456(6) . ?
In8 S20 2.487(6) . ?
In10 S3 2.424(6) 2_656 ?
In10 S26 2.434(6) . ?
In10 S21 2.455(7) . ?
In10 S19 2.463(6) . ?
In20 S34 2.384(7) 3_455 ?
In20 S1 2.399(7) . ?
In20 S8 2.485(7) . ?
In20 S2 2.488(7) . ?
In21 S1 2.411(7) . ?
In21 S3 2.428(6) . ?
In21 S4 2.481(6) . ?
In21 S6 2.496(6) . ?
In23 S38 2.446(6) . ?
In23 S33 2.452(7) . ?
In23 S35 2.479(7) . ?
In23 S34 2.488(7) . ?
In24 S38 2.399(6) . ?
In24 S41 2.440(6) . ?
In24 S8 2.502(7) 3_545 ?
In24 S39 2.504(7) . ?
In25 S36 2.397(8) . ?
In25 S35 2.400(6) . ?
In25 S39 2.433(7) . ?
In25 S2 2.551(7) 3_545 ?
In26 S40 2.391(6) . ?
In26 S37 2.414(7) . ?
In26 S36 2.454(7) . ?
In26 S5 2.468(7) 3_545 ?
In28 S43 2.398(6) . ?
In28 S41 2.404(6) . ?
In28 S42 2.464(8) . ?
In28 S9 2.480(5) 3_545 ?
In14 S13 2.339(6) 2_656 ?
In14 S20 2.342(6) 2_656 ?
In14 S18 2.371(6) . ?
In14 S16 2.377(5) . ?
In12 S42 2.321(7) 3_455 ?
In12 S15 2.353(6) . ?
In12 S14 2.362(6) . ?
In12 S23 2.391(7) . ?
In9 S19 2.323(6) . ?
In9 S12 2.342(6) 2_656 ?
In9 S18 2.352(6) . ?
In9 S25 2.360(6) . ?
In27 S39 2.333(6) . ?
In27 S7 2.339(6) 3_545 ?
In27 S40 2.410(6) . ?
In27 S42 2.461(7) . ?
In7 S21 2.311(6) . ?
In7 S28 2.327(5) . ?
In7 S12 2.376(6) 2_656 ?
In7 S23 2.399(7) . ?
In6 S22 2.272(5) . ?
In6 S20 2.329(6) . ?
In6 S12 2.364(6) 2_656 ?
In6 S27 2.426(6) . ?
In13 S15 2.335(7) . ?
In13 S21 2.380(6) . ?
In13 S4 2.389(6) 2_656 ?
In13 S10 2.392(6) 2_656 ?
In22 S2 2.312(7) . ?
In22 S4 2.350(6) . ?
In22 S5 2.378(7) . ?
In22 S7 2.409(6) . ?
In18 S40 2.18(7) 3_455 ?
In18 S5 2.43(9) 2_656 ?
In18 S15 2.48(8) . ?
In18 S11 2.53(7) . ?
In11 S22 2.333(5) . ?
In11 S9 2.375(5) . ?
In11 S13 2.401(6) . ?
In11 S14 2.421(6) . ?
In16 S9 2.306(6) . ?
In16 S7 2.329(6) . ?
In16 S8 2.337(7) . ?
In16 S6 2.357(7) . ?
In15 S13 2.368(6) 2_656 ?
In15 S19 2.368(6) . ?
In15 S6 2.374(6) 2_656 ?
In15 S10 2.437(6) 2_656 ?
Zn14 S13 2.339(6) 2_656 ?
Zn14 S20 2.342(6) 2_656 ?
Zn14 S18 2.371(6) . ?
Zn14 S16 2.377(5) . ?
Zn12 S42 2.321(7) 3_455 ?
Zn12 S15 2.353(6) . ?
Zn12 S14 2.362(6) . ?
Zn12 S23 2.391(7) . ?
Zn9 S19 2.323(6) . ?
Zn9 S12 2.342(6) 2_656 ?
Zn9 S18 2.352(6) . ?
Zn9 S25 2.360(6) . ?
Zn27 S39 2.333(6) . ?
Zn27 S7 2.339(6) 3_545 ?
Zn27 S40 2.410(6) . ?
Zn27 S42 2.461(7) . ?
Zn7 S21 2.311(6) . ?
Zn7 S28 2.327(5) . ?
Zn7 S12 2.376(6) 2_656 ?
Zn7 S23 2.399(7) . ?
Zn6 S22 2.272(5) . ?
Zn6 S20 2.329(6) . ?
Zn6 S12 2.364(6) 2_656 ?
Zn6 S27 2.426(6) . ?
Zn13 S15 2.335(7) . ?
Zn13 S21 2.380(6) . ?
Zn13 S4 2.389(6) 2_656 ?
Zn13 S10 2.392(6) 2_656 ?
Zn22 S2 2.312(7) . ?
Zn22 S4 2.350(6) . ?
Zn22 S5 2.378(7) . ?
Zn22 S7 2.409(6) . ?
Zn18 S5 2.367(15) 2_656 ?
Zn18 S15 2.384(13) . ?
Zn18 S40 2.418(11) 3_455 ?
Zn18 S11 2.421(12) . ?
Zn11 S22 2.333(5) . ?
Zn11 S9 2.375(5) . ?
Zn11 S13 2.401(6) . ?
Zn11 S14 2.421(6) . ?
Zn16 S9 2.306(6) . ?
Zn16 S7 2.329(6) . ?
Zn16 S8 2.337(7) . ?
Zn16 S6 2.357(7) . ?
Zn15 S13 2.368(6) 2_656 ?
Zn15 S19 2.368(6) . ?
Zn15 S6 2.374(6) 2_656 ?
Zn15 S10 2.437(6) 2_656 ?
S16 Zn1 2.373(5) 2_656 ?
S16 Zn14 2.377(5) 2_656 ?
S16 In14 2.377(5) 2_656 ?
S11 Zn2 2.329(5) 2_656 ?
S11 Zn18 2.421(12) 2_656 ?
S11 In18 2.53(7) 2_656 ?
S6 Zn15 2.374(6) 2_656 ?
S6 In15 2.374(6) 2_656 ?
S9 In28 2.480(5) 3_455 ?
S13 Zn14 2.339(6) 2_656 ?
S13 In14 2.339(6) 2_656 ?
S13 Zn15 2.368(6) 2_656 ?
S13 In15 2.368(6) 2_656 ?
S14 Zn1 2.341(6) 2_656 ?
S10 Zn13 2.392(6) 2_656 ?
S10 In13 2.392(6) 2_656 ?
S10 Zn15 2.437(6) 2_656 ?
S10 In15 2.437(6) 2_656 ?
S12 Zn9 2.342(6) 2_656 ?
S12 In9 2.342(6) 2_656 ?
S12 Zn6 2.364(6) 2_656 ?
S12 In6 2.364(6) 2_656 ?
S12 In7 2.376(6) 2_656 ?
S12 Zn7 2.376(6) 2_656 ?
S20 Zn14 2.342(6) 2_656 ?
S20 In14 2.342(6) 2_656 ?
S2 In25 2.551(7) 3_455 ?
S8 In24 2.502(7) 3_455 ?
S17 In8 2.408(5) 2_656 ?
S3 In10 2.424(6) 2_656 ?
S4 Zn13 2.389(6) 2_656 ?
S4 In13 2.389(6) 2_656 ?
S7 Zn27 2.338(6) 3_455 ?
S7 In27 2.338(6) 3_455 ?
S43 In5 2.404(6) 3_545 ?
S42 Zn12 2.321(7) 3_545 ?
S42 In12 2.321(7) 3_545 ?
S40 In18 2.18(7) 3_545 ?
S40 Zn18 2.418(11) 3_545 ?
S37 In26 2.414(7) 2_756 ?
S5 Zn18 2.367(15) 2_656 ?
S5 In18 2.43(9) 2_656 ?
S5 In26 2.468(7) 3_455 ?
S34 In20 2.384(7) 3_545 ?
 
loop_
 _geom_angle_atom_site_label_1
 _geom_angle_atom_site_label_2
 _geom_angle_atom_site_label_3
 _geom_angle
 _geom_angle_site_symmetry_1
 _geom_angle_site_symmetry_3
 _geom_angle_publ_flag
S32 In1 S31 109.3(2) . . ?
S32 In1 S30 113.7(2) . . ?
S31 In1 S30 110.4(3) . . ?
S32 In1 S33 110.5(2) . . ?
S31 In1 S33 109.1(3) . . ?
S30 In1 S33 103.6(2) . . ?
S32 O1 S35 120.8(8) . . ?
S10 Zn1 S12 109.4(2) . . ?
S10 Zn1 S14 107.6(2) . 2_656 ?
S12 Zn1 S14 111.1(2) . 2_656 ?
S10 Zn1 S16 109.62(18) . . ?
S12 Zn1 S16 109.2(2) . . ?
S14 Zn1 S16 109.86(17) 2_656 . ?
S31 In2 S24 106.3(2) . . ?
S31 In2 S27 108.4(2) . . ?
S24 In2 S27 108.4(2) . . ?
S31 In2 S25 111.4(2) . . ?
S24 In2 S25 108.92(19) . . ?
S27 In2 S25 113.2(2) . . ?
S14 Zn2 S11 107.95(17) . . ?
S14 Zn2 S7 109.4(2) . . ?
S11 Zn2 S7 111.4(2) . . ?
S14 Zn2 S10 110.1(2) . . ?
S11 Zn2 S10 106.78(17) . . ?
S7 Zn2 S10 111.1(2) . . ?
S32 In3 S28 112.92(19) . . ?
S32 In3 S26 106.1(2) . . ?
S28 In3 S26 108.4(2) . . ?
S32 In3 S25 108.2(2) . . ?
S28 In3 S25 111.33(18) . . ?
S26 In3 S25 109.7(2) . . ?
S30 In4 S29 105.0(2) . . ?
S30 In4 S27 109.9(2) . . ?
S29 In4 S27 108.5(2) . . ?
S30 In4 S28 112.9(2) . . ?
S29 In4 S28 108.8(2) . . ?
S27 In4 S28 111.50(18) . . ?
S43 In5 S29 104.3(2) 3_455 . ?
S43 In5 S23 108.4(2) 3_455 . ?
S29 In5 S23 110.0(2) . . ?
S43 In5 S22 111.29(19) 3_455 . ?
S29 In5 S22 110.9(2) . . ?
S23 In5 S22 111.63(19) . . ?
S17 In8 S24 105.0(2) . . ?
S17 In8 S18 110.33(16) . . ?
S24 In8 S18 109.97(19) . . ?
S17 In8 S20 110.84(15) . . ?
S24 In8 S20 109.97(19) . . ?
S18 In8 S20 110.6(2) . . ?
S3 In10 S26 103.6(2) 2_656 . ?
S3 In10 S21 110.9(2) 2_656 . ?
S26 In10 S21 108.7(2) . . ?
S3 In10 S19 111.9(2) 2_656 . ?
S26 In10 S19 111.2(2) . . ?
S21 In10 S19 110.4(2) . . ?
S34 In20 S1 105.9(2) 3_455 . ?
S34 In20 S8 110.9(2) 3_455 . ?
S1 In20 S8 108.6(2) . . ?
S34 In20 S2 112.1(2) 3_455 . ?
S1 In20 S2 106.9(2) . . ?
S8 In20 S2 112.1(2) . . ?
S1 In21 S3 105.2(2) . . ?
S1 In21 S4 108.9(2) . . ?
S3 In21 S4 109.8(2) . . ?
S1 In21 S6 109.3(2) . . ?
S3 In21 S6 111.0(2) . . ?
S4 In21 S6 112.3(2) . . ?
S38 In23 S33 104.4(2) . . ?
S38 In23 S35 111.0(2) . . ?
S33 In23 S35 109.2(2) . . ?
S38 In23 S34 110.7(2) . . ?
S33 In23 S34 109.9(2) . . ?
S35 In23 S34 111.4(2) . . ?
S38 In24 S41 106.5(2) . . ?
S38 In24 S8 111.7(2) . 3_545 ?
S41 In24 S8 107.1(2) . 3_545 ?
S38 In24 S39 111.5(2) . . ?
S41 In24 S39 109.2(2) . . ?
S8 In24 S39 110.6(2) 3_545 . ?
S36 In25 S35 105.1(3) . . ?
S36 In25 S39 109.7(2) . . ?
S35 In25 S39 112.4(2) . . ?
S36 In25 S2 107.9(3) . 3_545 ?
S35 In25 S2 111.1(2) . 3_545 ?
S39 In25 S2 110.4(2) . 3_545 ?
S40 In26 S37 109.37(17) . . ?
S40 In26 S36 110.0(2) . . ?
S37 In26 S36 105.4(3) . . ?
S40 In26 S5 112.5(2) . 3_545 ?
S37 In26 S5 109.49(19) . 3_545 ?
S36 In26 S5 109.8(3) . 3_545 ?
S43 In28 S41 105.3(2) . . ?
S43 In28 S42 107.0(2) . . ?
S41 In28 S42 112.4(2) . . ?
S43 In28 S9 111.4(2) . 3_545 ?
S41 In28 S9 110.2(2) . 3_545 ?
S42 In28 S9 110.5(2) . 3_545 ?
S13 In14 S20 106.9(2) 2_656 2_656 ?
S13 In14 S18 106.2(2) 2_656 . ?
S20 In14 S18 110.2(2) 2_656 . ?
S13 In14 S16 111.7(2) 2_656 . ?
S20 In14 S16 110.60(17) 2_656 . ?
S18 In14 S16 111.14(18) . . ?
S42 In12 S15 108.4(3) 3_455 . ?
S42 In12 S14 112.1(2) 3_455 . ?
S15 In12 S14 111.8(2) . . ?
S42 In12 S23 104.2(2) 3_455 . ?
S15 In12 S23 106.2(2) . . ?
S14 In12 S23 113.7(2) . . ?
S19 In9 S12 112.5(2) . 2_656 ?
S19 In9 S18 106.9(2) . . ?
S12 In9 S18 112.6(2) 2_656 . ?
S19 In9 S25 106.0(2) . . ?
S12 In9 S25 112.2(2) 2_656 . ?
S18 In9 S25 106.1(2) . . ?
S39 In27 S7 111.7(2) . 3_545 ?
S39 In27 S40 105.0(2) . . ?
S7 In27 S40 112.9(2) 3_545 . ?
S39 In27 S42 108.1(2) . . ?
S7 In27 S42 111.4(2) 3_545 . ?
S40 In27 S42 107.5(2) . . ?
S21 In7 S28 106.3(2) . . ?
S21 In7 S12 111.9(2) . 2_656 ?
S28 In7 S12 112.1(2) . 2_656 ?
S21 In7 S23 106.1(3) . . ?
S28 In7 S23 106.1(2) . . ?
S12 In7 S23 113.8(2) 2_656 . ?
S22 In6 S20 105.5(2) . . ?
S22 In6 S12 113.0(2) . 2_656 ?
S20 In6 S12 111.7(2) . 2_656 ?
S22 In6 S27 107.3(2) . . ?
S20 In6 S27 106.0(2) . . ?
S12 In6 S27 112.9(2) 2_656 . ?
S15 In13 S21 107.1(2) . . ?
S15 In13 S4 106.7(2) . 2_656 ?
S21 In13 S4 110.0(2) . 2_656 ?
S15 In13 S10 110.5(2) . 2_656 ?
S21 In13 S10 110.0(2) . 2_656 ?
S4 In13 S10 112.5(2) 2_656 2_656 ?
S2 In22 S4 105.2(2) . . ?
S2 In22 S5 106.8(2) . . ?
S4 In22 S5 105.9(2) . . ?
S2 In22 S7 111.8(2) . . ?
S4 In22 S7 112.6(2) . . ?
S5 In22 S7 113.9(2) . . ?
S40 In18 S5 112(3) 3_455 2_656 ?
S40 In18 S15 114(4) 3_455 . ?
S5 In18 S15 103(3) 2_656 . ?
S40 In18 S11 115(3) 3_455 . ?
S5 In18 S11 108(3) 2_656 . ?
S15 In18 S11 104(3) . . ?
S22 In11 S9 111.39(19) . . ?
S22 In11 S13 106.45(19) . . ?
S9 In11 S13 107.02(19) . . ?
S22 In11 S14 110.84(19) . . ?
S9 In11 S14 109.5(2) . . ?
S13 In11 S14 111.5(2) . . ?
S9 In16 S7 111.1(2) . . ?
S9 In16 S8 106.5(2) . . ?
S7 In16 S8 112.9(2) . . ?
S9 In16 S6 105.6(2) . . ?
S7 In16 S6 114.3(2) . . ?
S8 In16 S6 105.8(2) . . ?
S13 In15 S19 106.2(2) 2_656 . ?
S13 In15 S6 107.1(2) 2_656 2_656 ?
S19 In15 S6 109.5(2) . 2_656 ?
S13 In15 S10 110.8(2) 2_656 2_656 ?
S19 In15 S10 109.8(2) . 2_656 ?
S6 In15 S10 113.1(2) 2_656 2_656 ?
S13 Zn14 S20 106.9(2) 2_656 2_656 ?
S13 Zn14 S18 106.2(2) 2_656 . ?
S20 Zn14 S18 110.2(2) 2_656 . ?
S13 Zn14 S16 111.7(2) 2_656 . ?
S20 Zn14 S16 110.60(17) 2_656 . ?
S18 Zn14 S16 111.14(18) . . ?
S42 Zn12 S15 108.4(3) 3_455 . ?
S42 Zn12 S14 112.1(2) 3_455 . ?
S15 Zn12 S14 111.8(2) . . ?
S42 Zn12 S23 104.2(2) 3_455 . ?
S15 Zn12 S23 106.2(2) . . ?
S14 Zn12 S23 113.7(2) . . ?
S19 Zn9 S12 112.5(2) . 2_656 ?
S19 Zn9 S18 106.9(2) . . ?
S12 Zn9 S18 112.6(2) 2_656 . ?
S19 Zn9 S25 106.0(2) . . ?
S12 Zn9 S25 112.2(2) 2_656 . ?
S18 Zn9 S25 106.1(2) . . ?
S39 Zn27 S7 111.7(2) . 3_545 ?
S39 Zn27 S40 105.0(2) . . ?
S7 Zn27 S40 112.9(2) 3_545 . ?
S39 Zn27 S42 108.1(2) . . ?
S7 Zn27 S42 111.4(2) 3_545 . ?
S40 Zn27 S42 107.5(2) . . ?
S21 Zn7 S28 106.3(2) . . ?
S21 Zn7 S12 111.9(2) . 2_656 ?
S28 Zn7 S12 112.1(2) . 2_656 ?
S21 Zn7 S23 106.1(3) . . ?
S28 Zn7 S23 106.1(2) . . ?
S12 Zn7 S23 113.8(2) 2_656 . ?
S22 Zn6 S20 105.5(2) . . ?
S22 Zn6 S12 113.0(2) . 2_656 ?
S20 Zn6 S12 111.7(2) . 2_656 ?
S22 Zn6 S27 107.3(2) . . ?
S20 Zn6 S27 106.0(2) . . ?
S12 Zn6 S27 112.9(2) 2_656 . ?
S15 Zn13 S21 107.1(2) . . ?
S15 Zn13 S4 106.7(2) . 2_656 ?
S21 Zn13 S4 110.0(2) . 2_656 ?
S15 Zn13 S10 110.5(2) . 2_656 ?
S21 Zn13 S10 110.0(2) . 2_656 ?
S4 Zn13 S10 112.5(2) 2_656 2_656 ?
S2 Zn22 S4 105.2(2) . . ?
S2 Zn22 S5 106.8(2) . . ?
S4 Zn22 S5 105.9(2) . . ?
S2 Zn22 S7 111.8(2) . . ?
S4 Zn22 S7 112.6(2) . . ?
S5 Zn22 S7 113.9(2) . . ?
S5 Zn18 S15 107.4(5) 2_656 . ?
S5 Zn18 S40 105.7(5) 2_656 3_455 ?
S15 Zn18 S40 109.0(5) . 3_455 ?
S5 Zn18 S11 113.4(5) 2_656 . ?
S15 Zn18 S11 110.7(5) . . ?
S40 Zn18 S11 110.5(5) 3_455 . ?
S22 Zn11 S9 111.39(19) . . ?
S22 Zn11 S13 106.45(19) . . ?
S9 Zn11 S13 107.02(19) . . ?
S22 Zn11 S14 110.84(19) . . ?
S9 Zn11 S14 109.5(2) . . ?
S13 Zn11 S14 111.5(2) . . ?
S9 Zn16 S7 111.1(2) . . ?
S9 Zn16 S8 106.5(2) . . ?
S7 Zn16 S8 112.9(2) . . ?
S9 Zn16 S6 105.6(2) . . ?
S7 Zn16 S6 114.3(2) . . ?
S8 Zn16 S6 105.8(2) . . ?
S13 Zn15 S19 106.2(2) 2_656 . ?
S13 Zn15 S6 107.1(2) 2_656 2_656 ?
S19 Zn15 S6 109.5(2) . 2_656 ?
S13 Zn15 S10 110.8(2) 2_656 2_656 ?
S19 Zn15 S10 109.8(2) . 2_656 ?
S6 Zn15 S10 113.1(2) 2_656 2_656 ?
Zn1 S16 Zn1 109.5(3) 2_656 . ?
Zn1 S16 In14 109.48(7) 2_656 . ?
Zn1 S16 In14 109.15(7) . . ?
Zn1 S16 Zn14 109.48(7) 2_656 . ?
Zn1 S16 Zn14 109.15(7) . . ?
Zn1 S16 Zn14 109.15(7) 2_656 2_656 ?
Zn1 S16 Zn14 109.48(7) . 2_656 ?
Zn14 S16 Zn14 110.1(3) . 2_656 ?
Zn1 S16 In14 109.15(7) 2_656 2_656 ?
Zn1 S16 In14 109.48(7) . 2_656 ?
In14 S16 In14 110.1(3) . 2_656 ?
Zn2 S11 Zn2 112.3(3) . 2_656 ?
Zn2 S11 Zn18 109.3(3) . . ?
Zn2 S11 Zn18 108.8(3) 2_656 . ?
Zn2 S11 Zn18 108.8(3) . 2_656 ?
Zn2 S11 Zn18 109.3(3) 2_656 2_656 ?
Zn18 S11 Zn18 108.2(6) . 2_656 ?
Zn2 S11 In18 113.8(18) . 2_656 ?
Zn2 S11 In18 107(2) 2_656 2_656 ?
Zn2 S11 In18 107(2) . . ?
Zn2 S11 In18 113.8(18) 2_656 . ?
In18 S11 In18 103(4) 2_656 . ?
Zn16 S6 Zn15 107.5(3) . 2_656 ?
In16 S6 In15 107.5(3) . 2_656 ?
Zn16 S6 In21 106.5(2) . . ?
In16 S6 In21 106.5(2) . . ?
Zn15 S6 In21 105.8(2) 2_656 . ?
In15 S6 In21 105.8(2) 2_656 . ?
In16 S9 In11 109.7(2) . . ?
Zn16 S9 Zn11 109.7(2) . . ?
Zn16 S9 In28 108.8(2) . 3_455 ?
In16 S9 In28 108.8(2) . 3_455 ?
In11 S9 In28 107.4(2) . 3_455 ?
Zn11 S9 In28 107.4(2) . 3_455 ?
Zn14 S13 Zn15 109.2(2) 2_656 2_656 ?
In14 S13 In15 109.2(2) 2_656 2_656 ?
Zn14 S13 Zn11 107.2(2) 2_656 . ?
Zn15 S13 Zn11 107.0(2) 2_656 . ?
In14 S13 In11 107.2(2) 2_656 . ?
In15 S13 In11 107.0(2) 2_656 . ?
Zn6 S22 Zn11 110.1(2) . . ?
In6 S22 In11 110.1(2) . . ?
Zn6 S22 In5 107.8(2) . . ?
In6 S22 In5 107.8(2) . . ?
Zn11 S22 In5 107.1(2) . . ?
In11 S22 In5 107.1(2) . . ?
Zn2 S14 Zn1 111.2(2) . 2_656 ?
Zn2 S14 In12 110.3(2) . . ?
Zn1 S14 In12 109.2(2) 2_656 . ?
Zn2 S14 Zn12 110.3(2) . . ?
Zn1 S14 Zn12 109.2(2) 2_656 . ?
Zn2 S14 In11 108.6(2) . . ?
Zn1 S14 In11 107.5(2) 2_656 . ?
In12 S14 In11 110.0(2) . . ?
Zn2 S14 Zn11 108.6(2) . . ?
Zn1 S14 Zn11 107.5(2) 2_656 . ?
Zn12 S14 Zn11 110.0(2) . . ?
Zn1 S10 Zn2 111.1(2) . . ?
Zn1 S10 Zn13 111.0(2) . 2_656 ?
Zn2 S10 Zn13 109.3(2) . 2_656 ?
Zn1 S10 In13 111.0(2) . 2_656 ?
Zn2 S10 In13 109.3(2) . 2_656 ?
Zn1 S10 Zn15 109.7(2) . 2_656 ?
Zn2 S10 Zn15 107.0(2) . 2_656 ?
Zn13 S10 Zn15 108.5(2) 2_656 2_656 ?
Zn1 S10 In15 109.7(2) . 2_656 ?
Zn2 S10 In15 107.0(2) . 2_656 ?
In13 S10 In15 108.5(2) 2_656 2_656 ?
In13 S15 In12 107.9(3) . . ?
Zn13 S15 Zn12 107.9(3) . . ?
Zn13 S15 Zn18 107.4(4) . . ?
Zn12 S15 Zn18 106.9(4) . . ?
In13 S15 In18 112.6(19) . . ?
In12 S15 In18 105(2) . . ?
Zn1 S12 Zn9 109.9(2) . 2_656 ?
Zn1 S12 In9 109.9(2) . 2_656 ?
Zn1 S12 Zn6 108.6(2) . 2_656 ?
Zn9 S12 Zn6 110.6(2) 2_656 2_656 ?
Zn1 S12 In6 108.6(2) . 2_656 ?
In9 S12 In6 110.6(2) 2_656 2_656 ?
Zn1 S12 In7 109.0(2) . 2_656 ?
In9 S12 In7 109.8(2) 2_656 2_656 ?
In6 S12 In7 109.0(2) 2_656 2_656 ?
Zn1 S12 Zn7 109.0(2) . 2_656 ?
Zn9 S12 Zn7 109.8(2) 2_656 2_656 ?
Zn6 S12 Zn7 109.0(2) 2_656 2_656 ?
Zn12 S23 Zn7 105.1(3) . . ?
In12 S23 In7 105.1(3) . . ?
Zn12 S23 In5 106.7(3) . . ?
In12 S23 In5 106.7(3) . . ?
Zn7 S23 In5 105.5(3) . . ?
In7 S23 In5 105.5(3) . . ?
In23 S33 In1 103.1(2) . . ?
Zn9 S18 Zn14 107.4(3) . . ?
In9 S18 In14 107.4(3) . . ?
Zn9 S18 In8 108.0(2) . . ?
In9 S18 In8 108.0(2) . . ?
Zn14 S18 In8 106.9(2) . . ?
In14 S18 In8 106.9(2) . . ?
Zn6 S20 Zn14 109.3(2) . 2_656 ?
In6 S20 In14 109.3(2) . 2_656 ?
Zn6 S20 In8 108.2(2) . . ?
In6 S20 In8 108.2(2) . . ?
Zn14 S20 In8 106.8(2) 2_656 . ?
In14 S20 In8 106.8(2) 2_656 . ?
Zn9 S19 Zn15 108.1(2) . . ?
In9 S19 In15 108.1(2) . . ?
Zn9 S19 In10 108.7(2) . . ?
In9 S19 In10 108.7(2) . . ?
Zn15 S19 In10 107.0(2) . . ?
In15 S19 In10 107.0(2) . . ?
Zn7 S21 Zn13 108.3(3) . . ?
In7 S21 In13 108.3(3) . . ?
Zn7 S21 In10 109.2(3) . . ?
In7 S21 In10 109.2(3) . . ?
Zn13 S21 In10 106.9(2) . . ?
In13 S21 In10 106.9(2) . . ?
O1 S32 In3 118.0(5) . . ?
O1 S32 In1 110.4(6) . . ?
In3 S32 In1 108.2(2) . . ?
Zn22 S2 In20 109.8(3) . . ?
In22 S2 In20 109.8(3) . . ?
Zn22 S2 In25 108.0(3) . 3_455 ?
In22 S2 In25 108.0(3) . 3_455 ?
In20 S2 In25 104.3(2) . 3_455 ?
Zn7 S28 In3 109.3(2) . . ?
In7 S28 In3 109.3(2) . . ?
Zn7 S28 In4 109.67(19) . . ?
In7 S28 In4 109.67(19) . . ?
In3 S28 In4 105.8(2) . . ?
Zn16 S8 In20 108.2(3) . . ?
In16 S8 In20 108.2(3) . . ?
Zn16 S8 In24 108.9(3) . 3_455 ?
In16 S8 In24 108.9(3) . 3_455 ?
In20 S8 In24 104.5(3) . 3_455 ?
In4 S30 In1 104.3(2) . . ?
Zn9 S25 In3 108.5(2) . . ?
In9 S25 In3 108.5(2) . . ?
Zn9 S25 In2 108.3(2) . . ?
In9 S25 In2 108.3(2) . . ?
In3 S25 In2 105.8(2) . . ?
In8 S24 In2 105.0(2) . . ?
Zn6 S27 In2 106.9(2) . . ?
In6 S27 In2 106.9(2) . . ?
Zn6 S27 In4 106.9(2) . . ?
In6 S27 In4 106.9(2) . . ?
In2 S27 In4 105.6(2) . . ?
In5 S29 In4 104.0(2) . . ?
In2 S31 In1 106.6(3) . . ?
In10 S26 In3 103.5(2) . . ?
In8 S17 In8 105.2(3) . 2_656 ?
In10 S3 In21 104.1(2) 2_656 . ?
Zn22 S4 Zn13 107.9(2) . 2_656 ?
In22 S4 In13 107.9(2) . 2_656 ?
Zn22 S4 In21 107.9(2) . . ?
In22 S4 In21 107.9(2) . . ?
Zn13 S4 In21 106.3(2) 2_656 . ?
In13 S4 In21 106.3(2) 2_656 . ?
In20 S1 In21 106.0(3) . . ?
Zn16 S7 Zn27 111.8(2) . 3_455 ?
In16 S7 In27 111.8(2) . 3_455 ?
Zn16 S7 Zn2 109.4(3) . . ?
In16 S7 Zn2 109.4(3) . . ?
Zn27 S7 Zn2 108.9(2) 3_455 . ?
In27 S7 Zn2 108.9(2) 3_455 . ?
In16 S7 In22 110.0(2) . . ?
In27 S7 In22 109.0(3) 3_455 . ?
Zn2 S7 In22 107.7(2) . . ?
Zn16 S7 Zn22 110.0(2) . . ?
Zn27 S7 Zn22 109.0(3) 3_455 . ?
Zn2 S7 Zn22 107.7(2) . . ?
In28 S43 In5 106.2(2) . 3_545 ?
In12 S42 In27 106.1(3) 3_545 . ?
Zn12 S42 Zn27 106.1(3) 3_545 . ?
Zn12 S42 In28 110.4(3) 3_545 . ?
In12 S42 In28 110.4(3) 3_545 . ?
In27 S42 In28 104.5(3) . . ?
Zn27 S42 In28 104.5(3) . . ?
In18 S40 In26 110(2) 3_545 . ?
In18 S40 In27 106(2) 3_545 . ?
In26 S40 In27 108.6(2) . . ?
In26 S40 Zn27 108.6(2) . . ?
In26 S40 Zn18 109.7(4) . 3_545 ?
Zn27 S40 Zn18 105.3(4) . 3_545 ?
In28 S41 In24 105.3(2) . . ?
Zn27 S39 In25 110.4(3) . . ?
In27 S39 In25 110.4(3) . . ?
Zn27 S39 In24 108.9(2) . . ?
In27 S39 In24 108.9(2) . . ?
In25 S39 In24 106.0(2) . . ?
In24 S38 In23 106.2(2) . . ?
In25 S36 In26 104.7(3) . . ?
O1 S35 In25 115.6(5) . . ?
O1 S35 In23 107.8(5) . . ?
In25 S35 In23 106.0(3) . . ?
In26 S37 In26 105.3(4) . 2_756 ?
Zn18 S5 Zn22 105.7(4) 2_656 . ?
In22 S5 In18 111.3(17) . 2_656 ?
Zn18 S5 In26 107.5(4) 2_656 3_455 ?
In22 S5 In26 106.4(3) . 3_455 ?
Zn22 S5 In26 106.4(3) . 3_455 ?
In18 S5 In26 105.1(17) 2_656 3_455 ?
In20 S34 In23 106.4(3) 3_545 . ?
 
_refine_diff_density_max    3.829
_refine_diff_density_min   -3.399
_refine_diff_density_rms    0.383
loop_
  _platon_squeeze_void_nr
  _platon_squeeze_void_average_x
  _platon_squeeze_void_average_y
  _platon_squeeze_void_average_z
  _platon_squeeze_void_volume
  _platon_squeeze_void_count_electrons
  _platon_squeeze_void_content
   1 -0.011 -0.001 -0.009     13033      7113 ' '
_platon_squeeze_void_probe_radius                  1.20
_platon_squeeze_details                           ?
